# Supplementary material
Source: PubMed Central journal article supplement (PMC2266827)
Supplement: NIHMS38044-supplement-supplement.pdf [file NIHMS38044-supplement-supplement.pdf]

## RESEARCH REPORTS

Biological

R.B. Rutherford<sup>1\*</sup>, B.L. Foster<sup>2</sup>, T. Bammler<sup>3</sup>,  
R.P. Beyer<sup>3</sup>, S. Sato<sup>2</sup>, and M.J. Somerman<sup>2</sup>

<sup>1</sup>Department of Oral Biology, School of Dentistry, University of Washington, Box 357132, Seattle, WA 98195-7132, USA; <sup>2</sup>Department of Periodontics, School of Dentistry, University of Washington; and <sup>3</sup>Department of Environmental & Occupational Health Sciences, School of Medicine, University of Washington; \*corresponding author, rbruth@u.washington.edu

# Extracellular Phosphate Alters Cementoblast Gene Expression

*J Dent Res* 85(6):505-509, 2006

## APPENDIX

Gene Ontology (GO) Grouping of OCCM Genes Changing in Response to ePi

Transcription Factor Activity

| Unigene ID | Gene Name | Expression Change (hrs) |      |      |      |                  |      |
|------------|-----------|-------------------------|------|------|------|------------------|------|
|            |           | 1                       | 3    | 6    | 12   | 24               | 48   |
| Mm.24169   | Cebpa-rs1 | 2                       |      |      |      | 4.4 <sup>1</sup> |      |
| Mm.181959  | Egr 1     | 2.2                     |      |      |      | 2.2              |      |
| Mm.290421  | Egr 2     | 2.6                     | 5    | 2.8  |      |                  |      |
| Mm.205798  | Fkh18     |                         | 2.4  | 1.2  |      |                  |      |
| Mm.14092   | Foxc2     |                         | 3.2  | 2.4  | 2.6  | 2.2              |      |
| Mm.201322  | Adnp      |                         |      |      |      | 2.2              |      |
| Mm.270109  | Nr2f2     |                         |      |      |      | 2.6              |      |
| Mm.119     | Nr4a1     | 2.5                     |      |      |      | 3.0              |      |
| Mm.286407  | Sox9      |                         |      |      |      | 2.4              |      |
| Mm.3868    | Yy1       |                         |      |      |      | 2.1              |      |
| Mm.209903  | Alf2      |                         |      |      |      | 2.5              |      |
| Mm.5244    | Crem      |                         |      |      |      | 2.6              |      |
| Mm.4866    | Etv1      |                         |      |      |      | 2.0              |      |
| Mm.22700   | Gtf2h1    |                         |      |      |      | 2.3              |      |
| Mm.275071  | Jun       |                         |      |      |      | 3.6              |      |
| Mm.2444    | Myc       |                         | 2.0  |      |      | 3.2              |      |
| Mm.234641  | Rorb      |                         |      |      |      | 2.4              |      |
| Mm.212395  | Rai14     |                         |      |      |      | 2.0              |      |
| Mm.29581   | Hey1      |                         | -1.9 | -2.1 | -2.4 | -2.3             | -2.4 |
| Mm.27159   | Asb2      |                         |      |      |      | -3.0             | -2.0 |
| Mm.27908   | Nfatc4    |                         |      |      |      | -2.8             |      |
| Mm.9394    | Nfix      |                         |      |      |      | -2.2             |      |
| Mm.1802    | Prrx2     |                         |      |      |      | -2.6             |      |
| Mm.3410    | Six5      |                         |      |      |      | -2.4             |      |
| Mm.112     | Tcea3     |                         |      |      |      | -3.2             |      |
| Mm.3881    | Tcf15     |                         |      |      |      | -3.0             |      |
| Mm.39039   | Irx3      |                         | -2   |      |      |                  |      |
| Mm.10353   | Creb3l1   |                         |      |      | -2.1 | -4.0             |      |

continued on next page

## Skeletal Development, Ossification, and Bone Remodeling

| Unigene ID | Gene Name        | Expression Change (hrs) |      |      |      |      |      |
|------------|------------------|-------------------------|------|------|------|------|------|
|            |                  | 1                       | 3    | 6    | 12   | 24   | 48   |
| Mm.265264  | Ank              |                         |      |      | 4.6  |      |      |
| Mm.286407  | Sox              |                         |      |      | 2.8  |      |      |
| Mm.199008  | Dmp1             |                         |      |      | 2.8  |      |      |
| Mm.28440   | Pthlh            |                         |      |      | 2.2  | 3.8  |      |
| Mm.2529    | Phex             |                         |      |      |      | 2.5  |      |
| Mm.249221  | Tnfrsf11 (Rankl) |                         |      |      |      | 2.2  |      |
| Mm.259673  | Tob1             |                         |      |      |      | 2.0  |      |
| Mm.87858   | Bglap            |                         |      |      | -1.6 | -3.4 | -3.4 |
| Mm.1810    | Ctgf             |                         |      |      |      | -2.4 | -2.0 |
| Mm.294225  | Pthrl            |                         |      | -2.6 | -2.4 | -5.0 | -2.5 |
| Mm.4987    | BSP              |                         |      |      | -3.8 | -6.4 |      |
| Mm.263284  | Sp7 (osterix)    |                         | -2.6 | -3.8 | -4.8 |      |      |
| Mm.157751  | Otor             |                         |      |      |      | -7.4 |      |
| Mm.248380  | Tgfb1            |                         |      |      | -2.6 |      |      |

## Metalloproteinases, TIMP, Calcium Ion-binding

|           |             |  |      |     |      |      |      |
|-----------|-------------|--|------|-----|------|------|------|
| Mm.4993   | MMP 3       |  |      |     |      | 2.6  | 7.2  |
| Mm.5022   | MMP 13      |  |      |     |      |      | 6.4  |
| Mm.14126  | MMP 10      |  |      | 2.0 | 2.2  | 4.0  | 2.2  |
| Mm.8245   | TIMP 1      |  | 1.8  | 1.8 | 2.6  | 2.0  | 4.8  |
| Mm.28623  | CDH 17      |  |      |     |      | 3.0  |      |
| Mm.158700 | CSPG2       |  |      |     |      | 2.6  |      |
| Mm.25326  | DST         |  |      |     |      | 2.2  |      |
| Mm.5074   | LALBA       |  |      |     |      | 3.0  |      |
| Mm.269747 | LTBP 1      |  |      |     |      | 2.4  |      |
| Mm.117294 | MAN1A       |  |      |     |      | 3.0  |      |
| Mm.1213   | MASP 1      |  |      | 2.6 | 2.6  | 3.4  |      |
| Mm.10306  | PLSCR 2     |  |      |     |      | 2.0  |      |
| Mm.127156 | PROS 1      |  |      |     |      | 2.4  |      |
| Mm.276926 | PRSS 2      |  |      |     |      | 2.4  |      |
| Mm.703    | S100A 3     |  |      |     |      |      | 2.8  |
| Mm.21567  | S100A 8     |  |      |     |      |      | 2.4  |
| Mm.243085 | MGLAP       |  |      |     |      |      | 3.6  |
| Mm.6442   | PKD 2       |  |      |     |      | 2.2  |      |
| Mm.226899 | PKD2L 2     |  |      |     |      | 2.2  |      |
| Mm.4561   | MMP 11      |  | -1.2 | -1  | -1   | -2.8 | -0.6 |
| Mm.29373  | MMP 23      |  |      |     | -1.4 | -2.8 | -2.2 |
| Mm.4871   | TIMP 3      |  |      |     | -3.0 | -2.0 |      |
| Mm.3267   | ANXA8       |  |      |     |      | -2.2 |      |
| Mm.6306   | ATP2A3      |  |      |     |      | -1.5 |      |
| Mm.87858  | BGLAP (OCN) |  |      |     |      | -3.2 | -3.4 |
| Mm.219527 | CIS         |  |      |     |      | -3.0 |      |
| Mm.28623  | CALML4      |  |      |     |      | -3.2 |      |
| Mm.45127  | CGREF1      |  |      |     |      | -2.0 |      |
| Mm.288381 | FBLN 5      |  |      |     |      | -2.8 |      |
| Mm.24720  | FKBP 7      |  |      |     |      | -2.4 |      |
| Mm.289706 | LAMB 2      |  |      |     |      | -2.6 |      |
| Mm.29997  | RCN 3       |  |      |     |      | -2.0 |      |
| Mm.26688  | THBS 2      |  |      |     |      | -2.1 |      |
| Mm.30162  | SMOC 2      |  |      |     |      |      | -2.4 |
| Mm.271770 | MYL 9       |  |      |     |      | -4.6 |      |
| Mm.20348  | NID 2       |  |      |     |      | -3.0 |      |

continued on next page

## Cell-surface Receptor-linked Signal Transduction

| Unigene ID | Gene Name | Expression Change (hrs) |     |     |     |      |    |
|------------|-----------|-------------------------|-----|-----|-----|------|----|
|            |           | 1                       | 3   | 6   | 12  | 24   | 48 |
| Mm.896     | IL1R 1    |                         |     |     |     | 2.0  |    |
| Mm.731     | IL12RB 1  |                         |     |     | 2.6 | 2.4  |    |
| Mm.24208   | IL13RA 1  |                         |     | 2.6 |     |      |    |
| Mm.233802  | IL4RA     |                         | 2.0 |     |     | 2.3  |    |
| Mm.10760   | OSMR      |                         | 2.2 |     |     | 2.8  |    |
| Mm.1359    | PLAUR     |                         |     |     |     | 2.8  |    |
| Mm.193451  | IL1RA 1   |                         |     |     |     | -2.4 |    |

## Cell Growth and/or Maintenance

|           |        |     |     |     |     |      |  |
|-----------|--------|-----|-----|-----|-----|------|--|
| Mm.329515 | ABL 2  |     |     |     |     | 2.4  |  |
| Mm.4128   | AXL    |     |     |     |     | 3.0  |  |
| Mm.272183 | BTG 1  |     |     |     |     | 3.0  |  |
| Mm.280125 | CRK    |     |     |     |     | 2.1  |  |
| Mm.22574  | CSF 1R |     |     |     |     | 3.2  |  |
| Mm.21013  | CXCL 1 | 6.0 | 8.1 | 4.4 | 2.0 | 5.0  |  |
| Mm.261453 | ECT 2  |     |     |     |     | 3.2  |  |
| Mm.275071 | JUN    |     |     |     | 2.0 | 3.8  |  |
| Mm.288898 | MLLT 3 |     |     |     |     | 2.0  |  |
| Mm.2444   | MYC    |     | 2.0 |     |     | 3.4  |  |
| Mm.4809   | PGF    |     | 2.6 |     | 2.2 | 3.6  |  |
| Mm.259653 | RASA 1 |     |     | 2.0 | 2.0 | 3.8  |  |
| Mm.282184 | VEGFA  |     |     |     |     | 2.6  |  |
| Mm.10222  | WISP 1 |     |     |     |     | -2.0 |  |

TGF- $\beta$  Signaling Pathway

|           |        |  |      |      |      |      |  |
|-----------|--------|--|------|------|------|------|--|
| Mm.269747 | LAP    |  |      |      |      | 2.4  |  |
| Mm.275071 | JUN    |  |      |      |      | 3.8  |  |
| Mm.248380 | TGFB 1 |  |      |      |      | -2.6 |  |
| Mm.6813   | BMP 4  |  | -2.0 | -2.4 |      |      |  |
| Mm.209571 | BMP 3  |  |      | -2.8 | -4.8 |      |  |

<sup>1</sup> Values are fold change.

<sup>2</sup> Blank cells indicate that gene did not pass selection criterion of expression fold change of  $\leq$  or  $\geq$  2.
